# Supplementary material for: Evolution of insect olfactory receptors
Source: eLife. 2014 Mar 26;3:e02115. doi: 10.7554/eLife.02115 (PMC3966513; doi:10.7554/eLife.02115)
Supplement: Figure 3—source data 1. — DOI: http://dx.doi.org/10.7554/eLife.02115.006 [file elife02115s001.xlsx]

## Sheet: Sheet1
SSR-recordings: average response
Lepismachilis y-signata
	limonene	Ethyl acetate	Ethyl hexanoate	Ethyl 3-hydroxybutyrate	Hexyl hexanoate	Propyl acetate	acetoin	2.3-butanedione	2-heptanone	6-methyl-5-hepten-2-one	1-hexanol	1-octen-3-ol	2-methylphenol	2-phenylethanol	2.3-butanediol	2-methylisoborneol	Linalool	Acetaldehyde	Benzaldeyde	Butyraldehyde	Valeraldehyde	E2-hexanal	Ammonia	Diethylamine	Ethyl amine	Pyrrolidine	Pyridine	Cadaverine	1.4-diaminobutane	2-phenylethylamine	Acetic acid	Propionic acid	Butyric acid	2-oxovaleric acid	Phenylacetic acid	Hexanoic acid	Firing rate
Lys-ab1A	3.33333	3.33333	1.33333	-5.66667	4.66667	8.66667	5.66667	3.66667	0.333333	2.66667	-9.33333	-1.33333	0.333333	2.66667	2.66667	3.33333	1.66667	2	-1.33333	-0.333333	-2.66667	2.33333	2	2	-2.33333	-6	-1.33333	-2	6	0	2	-1	-4	4	4	2.66667	6
Lys-ab1B	3.33333	0.666667	5.33333	12.6667	0	3.33333	3.33333	4.66667	6.66667	2.66667	3.33333	14.6667	5.33333	4.66667	4	3.33333	4.66667	2	5.33333	16.6667	10.6667	16	14	0.666667	1.33333	1.33333	2.66667	4.66667	1.33333	2	4	1.33333	9.33333	0.666667	0.666667	2	10
Lys-ab2A	20.8696	6.52174	31.3913	49.1304	3.56522	7.3913	7.91304	18.4348	54.087	55.3043	38.2174	50.6087	-4.69565	43.3043	51.6957	4.52174	42.6957	3.47826	66.1739	47.913	47.7391	64.087	4.34783	2.26087	2.78261	-7.04348	5.30435	35.0435	12	-5.13043	-0.782609	0.913043	1.65217	1.30435	9.04348	6.78261	28
Lys-ab2B	-0.26087	1.73913	-2	-1.04348	2.26087	0.695652	-1.21739	0	0.956522	-2.08696	-3.65217	-0.347826	-1.91304	-0.608696	0.26087	1.04348	2.08696	1.21739	-4.26087	8.6087	16.9565	15.3043	-0.869565	0.695652	0	-3.56522	0.956522	0.521739	-0.173913	-3.65217	24.7826	36.9565	21.913	0.0869565	2.95652	4.26087	4
Lys-ab3A	4.88462	4.53846	5	-10.3077	2.76923	3.38462	3.15385	4.76923	3	1.53846	0	2.53846	-1.07692	-1.15385	2.84615	5.38462	0.692308	3.38462	3.53846	43.0385	55.9615	63.5769	-1.46154	0.538462	1.38462	-8.96154	2.30769	0.153846	-0.230769	-8.30769	41.1538	41.1538	53.1923	2.23077	3.53846	0.615385	7
Lys-ab3B	19.9231	2.69231	17.6923	23.9231	2.53846	0.615385	3.69231	3.46154	18.3846	14.3846	24.5385	32.8462	-11.9231	-11.5385	4.15385	0.384615	28.3077	1.61538	4.15385	22.9615	45.8846	39.2692	3	-0.769231	-1.38462	-3.73077	0.384615	1.61538	0.461538	-7.15385	22.6154	36.0769	46.8462	1.69231	1.38462	2.19231	24
Lys-ab4A	30.6667	3	40.3333	29.5833	1	5.33333	7.5	13.5	21.6667	45.3333	46.5	17.1667	32.3333	43.8333	63.3333	55.6667	-2	5.5	56.5	22.8333	24.8333	14.8333	-0.833333	4.83333	1.33333	1	9	1.83333	5	2	2.33333	-1.5	4.5	0.666667	3.83333	3.16667	2
Lys-ab4B	0	0	0.333333	1.66667	0.333333	1.33333	0	0.666667	0	0	1.66667	0.666667	-1.33333	1.33333	0.666667	0	-0.333333	1	1.33333	0	-0.333333	-0.333333	0.666667	0.333333	-0.666667	1.66667	0	0.333333	2.33333	1	0.333333	2.33333	0	1.33333	1	0	4
Lys-ab4C	19.6667	3.16667	33	19.3333	4.16667	1.16667	0.666667	2	32.1667	26.3333	23.8333	24.5	27.5	25.3333	3.66667	3.16667	36.3333	22.3333	22.5	21.5	33.5	23.5	10.8333	6.16667	4.16667	2.83333	1.5	29.1667	32.8333	3.33333	12.5	71.6667	56.1667	1.16667	3.83333	2.66667	4
Lys-ab5A	1.33333	3.33333	2.66667	1.33333	1.33333	1.33333	1.33333	0.666667	-0.666667	0	3.33333	2.66667	0.666667	1.33333	1.33333	0	3.33333	4	-0.666667	10.6667	14.6667	12	7.33333	1.33333	2	-0.666667	2	2.66667	-1.33333	2	31.3333	23.3333	42	-0.666667	0	2.66667	4
Lys-ab5B	0	2	2	1.33333	2	4	2.66667	2	0	2.66667	0	-1.33333	-1.33333	2	-3.33333	3.33333	5.33333	-2	2.66667	3.33333	-0.666667	-4	3.33333	0	0	-2.66667	0.666667	4.66667	-0.666667	3.33333	-1.33333	-3.33333	-0.666667	2.66667	-0.666667	2	6
Lys-ab5C	0	1.33333	0	1.33333	0	-1.33333	0	-0.666667	0	-0.666667	0	0	0.666667	0	0	0	2	1.33333	0	-0.666667	0.666667	0	0	0.666667	0.666667	0	0	1.33333	0.666667	-0.666667	-0.666667	0.666667	0.666667	0.666667	0.666667	1.33333	2
Thermobia domestica
	limonene	Ethyl acetate	Ethyl hexanoate	Ethyl 3-hydroxybutyrate	Hexyl hexanoate	Propyl acetate	acetoin	2.3-butanedione	2-heptanone	6-methyl-5-hepten-2-one	1-hexanol	1-octen-3-ol	2-methylphenol	2-phenylethanol	2.3-butanediol	2-methylisoborneol	Linalool	Acetaldehyde	Benzaldeyde	Butyraldehyde	Valeraldehyde	E2-hexanal	Ammonia	Diethylamine	Ethyl amine	Pyrrolidine	Pyridine	Cadaverine	1.4-diaminobutane	2-phenylethylamine	Acetic acid	Propionic acid	Butyric acid	2-oxovaleric acid	Phenylacetic acid	Hexanoic acid	Firing rate
Td-ab1A	0.4	-0.8	-2	1.2	0.4	0.2	2	0.8	0	0.8	-1.6	0.8	-1.2	0.4	0.6	1.6	0.4	0.8	0	-0.4	1.4	-0.8	-2	1.8	0.8	-1.6	0	-1.6	-2.4	-1.6	-2.4	0.4	-2	0.8	-0.8	-1.6	20
Td-ab1B	0.8	1	0.6	2.2	0.8	1.2	1.2	1.8	0	1.2	0	2	1.2	0.8	1.2	0.8	1.2	0.8	0.8	0.4	0.8	0.4	0.4	0	0.4	1	0.4	0.8	0.4	0.8	0.8	0.6	1.2	1.2	1.2	2	5
Td-ab2A	54.5	1.25	103.5	3.75	-4	2.5	1.25	2.25	95.25	87.25	108.25	105.25	-11	1.5	0.5	-0.25	-2.5	1.75	56.5	3	49	73.75	1	0.25	1.25	1.25	1.75	1.5	0.5	0.25	0.5	3.75	-1	0.5	1.5	58	10
Td-ab2B	1.5	2.25	0.5	4.25	-5.5	1.75	1.75	5.25	1.5	1.75	1.25	0.25	31.5	1.75	1.5	2.25	-4	8	0.75	1	0	1.5	1	2	1.25	0.25	3.5	4.5	1	-2.25	1.75	1	0	7.5	1.5	-1	10
Td-ab2C	-1	2.5	0.5	1.25	-1.25	1.75	0.75	1.5	-3	0	0.857143	0.75	96.25	1	1.5	1.75	-2.25	2	26.25	0.25	2	2	3.5	1.5	0.75	1	1.75	-0.5	0.75	-1.75	2.75	0.75	2	8.25	1.25	60	2
Td-ab3A	2	3.2	113.6	2	0.8	6.8	6.8	3.6	68.8	14.4	109.2	3.6	-4.4	30.4	3.2	2.4	2.4	3.2	43.2	3.2	53.6	60.2	0.4	1.2	2.4	16.4	6	3.2	5.2	-8.4	5.6	8	3.2	0.4	3.6	93.2	8
Td-ab3B	53.6	10.4	0.8	36	30.4	13.2	1.2	104	1.6	56.8	53.6	128.4	-4.4	24	1.2	94.8	4	100.4	87.6	84.4	68.4	64	0.4	0.8	0.4	2.4	4.8	3.2	1.8	-3.2	3.6	4.8	2	0.4	0.4	1.2	6
Td-ab3C	24	27.2	57.2	14.4	10.4	15.2	5.6	48.4	32.4	42.4	31.6	47.2	13.6	64	12.4	18.8	15.2	6.8	0	40.4	0	9.6	2.4	2.8	6.8	6	34.8	4.8	49.2	27.6	0.4	4.4	0	2.8	19.6	53.6	3
Td-ab4A	7	-0.4	1.8	-0.6	7.4	1	47	31.2	0.8	2	-2.8	-2.2	-6.2	-2	-0.2	3.4	4	52.2	-3.4	3	-3	-1.4	0.4	-4.2	-1.8	-4.2	3.6	0.6	-1.4	-6.8	65.2	69.6	38	3	1.2	-1.4	16
Td-ab4B	0.6	-0.2	0.2	0	0.2	-0.2	-0.2	-0.2	0	0	0	-0.4	0	0	0	0.4	-0.4	0	0	0	1.8	0	0	-0.6	62.8	0	0.2	1.8	-0.4	-0.6	0.4	0	-0.4	-1.2	-0.8	0	2
Td-ab5A	0.857143	-0.571429	-0.285714	-4.85714	0	-0.571429	-2	-2	-3.42857	-1.14286	-4.85714	-3.71429	-1.14286	-2	-1.14286	1.14286	-0.857143	0.857143	-2	0.285714	-1.14286	0.285714	75.4286	70	88	74	1.14286	58.5714	6	-4.85714	1.42857	-2	-3.14286	-1.42857	1.14286	-0.857143	4
Td-ab5B	2.28571	1.42857	-0.285714	-3.42857	0.857143	-2.28571	1.42857	1.71429	-2.28571	-5.71429	-4.57143	-3.14286	-6.57143	-4.57143	-0.285714	2	-2.85714	3.14286	-1.71429	2.28571	87.4286	21.1429	-2.28571	4.28571	-2.28571	-4	-0.285714	1.71429	-1.14286	-6.28571	24.8571	23.4286	28	2.57143	1.71429	38.5714	10
Td-ab5C	1.42857	1.42857	1.14286	-1.14286	0.571429	0.285714	0.571429	-2.57143	0	-1.42857	-1.71429	0.857143	-1.14286	-3.42857	0.285714	0	-1.42857	0.285714	-2.57143	4	-2.85714	25.4286	-0.285714	-0.285714	-0.571429	-3.42857	-0.285714	83.7143	1.14286	-2.57143	0.571429	1.14286	0.571429	36	0	0.285714	2
Phyllium siccifolium
	limonene	Ethyl acetate	Ethyl hexanoate	Ethyl 3-hydroxybutyrate	Hexyl hexanoate	Propyl acetate	acetoin	2.3-butanedione	2-heptanone	6-methyl-5-hepten-2-one	1-hexanol	1-octen-3-ol	2-methylphenol	2-phenylethanol	2.3-butanediol	2-methylisoborneol	Linalool	Acetaldehyde	Benzaldeyde	Butyraldehyde	Valeraldehyde	E2-hexanal	Ammonia	Diethylamine	Ethyl amine	Pyrrolidine	Pyridine	Cadaverine	1.4-diaminobutane	2-phenylethylamine	Acetic acid	Propionic acid	Butyric acid	2-oxovaleric acid	Phenylacetic acid	Hexanoic acid	Firing rate
Ps-ab1A	52.3333	2.91667	35.5	42.4167	1.41667	1.83333	3.91667	3.41667	5	54.5833	121	97.75	4.66667	44.6667	3.16667	43.75	75.6667	7.66667	29	26.6667	3.33333	28.2917	-0.25	2.58333	0	2.58333	2.33333	1.58333	1.25	1	-0.166667	-0.333333	0.333333	2.08333	2.5	1	3
Ps-ab1B	-4.25	0.583333	2	21.75	20.5833	-1.08333	3	1	1.41667	2.33333	22.5	-4	0.833333	-3.41667	3.91667	-1.75	19.75	-0.666667	-0.833333	0	-0.166667	-2.25	0.166667	2.33333	0.416667	-3.83333	1.91667	1.5	1	-6.83333	0.166667	0.0833333	0.833333	1.08333	2.75	16.5	10
Ps-ab2A	91.2941	2.94118	71.5588	66.0882	62.0294	3.94118	5.70588	37.4412	65.3529	101.735	86.1176	84.0588	4	68.6471	30.7059	68.4118	95.1176	47.6176	58.2941	73.6765	59.8824	67.3824	0.176471	4.05882	3.29412	4.11765	2.64706	2.70588	3.67647	27.5294	13.6765	3.5	2.05882	20.1176	15.2941	36.3529	3
Ps-ab2B	-9.25	-0.25	-5.4375	24.25	-0.8125	1.9375	1.25	0.75	-6.71875	-6.625	-6.125	-6.6875	-1.5625	-7	3.1875	-3.5	-7.8125	0.4375	-8.6875	-6.0625	-8.65625	-6.65625	0.875	-0.5	1.125	-3.4375	1.5625	2.125	1.75	-5.0625	27.5625	26.625	31.875	21.8125	17.8125	53.875	10
Ps-ab3A	72.6667	2.66667	33.7778	10.4444	61.3333	4.44444	5.11111	4.22222	26	44.4444	50	75.1111	1.55556	40	4.22222	3.11111	80	3.11111	17.1111	27.7778	2.44444	20.8889	-0.888889	2	2.44444	3.77778	2.22222	1.33333	2	-1.55556	0.222222	0.666667	-0.222222	1.55556	3.55556	2.44444	8
Ps-ab3B	0.444444	7.55556	-0.222222	21.1111	-6.22222	9.55556	20.2222	12.2222	33.3333	51.1111	4	-4	-25.1111	1.77778	13.1111	27.1111	-8.22222	25.5556	-10.4444	15.7778	27.7778	-7.55556	1.77778	23.5556	-0.444444	27.1111	18.2222	29.5556	29.3333	-3.77778	26	33.7778	26.2222	27.5556	23.5556	40.4444	8
Ps-ab4A	-5.6	2.8	120.8	89.2	112.4	7.2	1.2	8	36	98	109.2	47.6	-5.6	50.4	8	7.2	-5.2	-6.4	2.8	17.2	35.2	70	7.2	3.6	6.4	21.6	10	5.6	3.2	43.2	-1.2	2	-3.2	4.8	39.6	23.2	10
Ps-ab4B	28.4	1.6	-1.6	25.6	-2.4	3.2	1.6	2	1.6	38.6	-2.4	23.2	0.4	2.8	3.2	0	43.2	0.8	0.4	0.8	-0.8	-0.4	2	2	1.2	2.4	-2.4	2	3.2	21.6	5.6	3.2	0.8	3.6	1.6	-1.6	4
Ps-ab5A	-6	3.66667	-2.66667	49.3333	-6.66667	5	-0.666667	0	2.33333	-9.66667	1.33333	-3.66667	108	2.66667	3.66667	-6.33333	-8.66667	-3	133.333	-6.66667	-7	-4.33333	3.66667	6.33333	5	2.66667	4.33333	4	9.33333	8	-5.33333	-2.33333	-5.33333	4.33333	18.3333	-6.33333	7
Ps-ab5B	1.66667	8	-4	31	-2.33333	5.66667	1.66667	4.66667	2	-3.66667	5	-4.66667	23.3333	-11	6.33333	5.33333	-2.66667	126.333	-10.6667	0.333333	86.6667	30.3333	2	2.66667	2.66667	14.6667	3.66667	6	1.66667	52.3333	0.666667	0.333333	1.33333	2.33333	4	-1.33333	6
Ps-ab6A	56.8	0.4	24.8	33.2	0	5.2	4.4	3.6	11.2	42.8	43.2	62.4	-1.2	42.8	4.4	48	71.6	7.6	16.4	18.4	1.2	5.2	-1.2	0.8	-1.2	2.8	1.6	0.8	0.8	-3.6	3.2	-1.6	-0.4	1.2	2.8	4	4
Ps-ab6B	32	-1.6	73.2	41.2	83.2	-1.2	5.6	1.2	26.4	77.2	45.6	61.2	52	53.2	0	-0.8	60.4	7.2	26.8	37.2	26	23.2	1.6	2.8	6.8	-0.4	-0.8	3.2	7.2	-11.6	-0.8	18	5.6	13.2	28.4	32	10
Ps-ab7A	14	0	-1	3	-3	-2	13.5	6	-0.5	4.5	10.5	2	-1	-1	18	100	13.5	9.5	-2.5	1	-1	-3	-1	1	2.5	5.5	-1	0.5	-0.5	1	-3	-2.5	1	-0.5	-0.5	0.5	18
Ps-ab7B	-2	0.5	58	51.5	51.5	-1	1	4	28	59.5	32.5	7.5	-2	32	3.5	1	15	1	6	2	-2.5	-2	0.5	-0.5	2	2.5	1	-1	0.5	-3	-3.5	-0.5	0.5	4	0.5	2.5	5
Ps-ab8A	47	-1	13	53	-6	-11	11	32	-1	21	28	69	-19	30	33	28	146	13	-3	19	-11	1	-13	21	9	81	40	9	36	-11	-9	13	-11	5	-11	-6	10
Ps-ab8B	8	11	1	-21	23	-1	69	31	17	-12	3	5	-12	8	-9	-1	-14	51	5	96	144	136	-3	1	-4	-11	-4	-3	-9	-21	142	139	141	44	9	146	20
Ps-ab9A	111	1	25	84	3	7	16	10	60	121	109	110	19	25	12	19	138	18	5	52	27	34	2	3	7	1	3	6	0	2	2	3	6	23	5	6	5
Ps-ab9B	6	-2	30	1	58	5	2	3	-3	-10	3	-8	1	33	-3	2	-10	19	8	-2	-8	20	0	-2	0	8	1	-3	1	1	-4	3	-2	-3	141	-1	6
Ps-ab10A	14.6667	4	-2	38	-8.66667	4.66667	0.666667	4.66667	3.33333	18.6667	69.3333	3.33333	42.6667	97.3333	2	2.66667	-8.66667	19.3333	68	14.6667	26	44.6667	2	3.33333	5.33333	5.33333	8.66667	2.66667	3.33333	60	3.33333	1.33333	3.33333	2.66667	4	30.6667	10
Ps-ab10B	1.33333	2.66667	0.666667	35.3333	-4	5.33333	-1.33333	4	-1.33333	24.6667	-0.666667	2.66667	-6.66667	-3.33333	5.33333	1.33333	109.333	0	-8.66667	14	-2.66667	-0.666667	2.66667	15.3333	-1.33333	-0.666667	34	4.66667	14	-4	0.666667	3.33333	-2	-5.33333	0	-2	2
Ps-ab11A	3.33333	3.33333	0.666667	81.3333	46.6667	3.33333	9.33333	45.3333	8	4.66667	90	44.6667	-14	98.6667	1.33333	6.66667	-14	8	16.6667	16.6667	2	26	4	1.33333	1.33333	34	1.33333	29.3333	30	2	130.667	100	46.6667	31.3333	36.6667	10.6667	10
Ps-ab11B	0	-2	4.66667	-8	-5.33333	1.33333	2.66667	-2.66667	24	46.6667	-2.66667	-4	-10	-3.33333	13.3333	2	-4	0.666667	-6	2	2	-2	-1.33333	1.33333	3.33333	-1.33333	3.33333	0.666667	1.33333	-1.33333	-4.66667	-0.666667	-2.66667	0.666667	2	-0.666667	20
Ps-ab12A	-3	8	-10	47	-3	3	0	0	-7	-5	29	-2	145	40	1	-6	-9	6	146	-10	-11	0	2	-1	-1	20	34	3	3	30	1	-1	-2	3	11	-5	15
Ps-ab12B	-7	2	7	19	3	11	5	-3	19	115	-11	1	-12	-13	3	3	-22	-4	-14	-1	-4	-9	-2	-2	-2	-2	-19	-4	3	-4	-4	3	-1	-1	-5	3	14
Ps-ab13A	2	3	1	1	2	1	1	3	1	5	99	2	-9	-21	0	3	-5	1	-18	1	3	47	-2	2	4	5	1	-2	18	31	3	2	-4	11	26	56	15
Ps-ab13B	1	9	35	29	-2	0	0	45	1	88	-1	1	101	124	11	1	88	1	118	21	9	1	-1	19	10	10	46	5	14	-1	9	12	12	4	2	1	8
Ps-ab14A	79	3	57	119	-9	1	49	102	31	116	161	105	73	135	105	145	135	49	62	136	3	51	-1	11	-1	47	17	31	1	117	-1	1	-3	1	6	-21	5
Ps-ab14B	58	0	21	47	21	3	2	0	57	69	0	38	0	32	-9	0	1	29	61	0	13	41	-2	1	-1	0	4	0	-2	0	0	-3	2	0	6	28	15
Ps-ab15A	3	0	0	0	0	0	0	0	0	0	0	0	0	0	0	0	5	0	0	0	6	0	0	0	0	0	0	0	0	5	0	0	0	0	0	5	8
Ps-ab15B	28	1	5	22	-5	-1	13	3	-2	-2	-2	28	10	0	0	18	32	11	-1	21	29	22	-1	0	1	0	0	7	0	4	15	19	12	19	6	41	8
Ps-ab16A	1	2	2	1	1	2	1	1	12	18	3	0	3	3	3	0	4	8	1	6.5	2	1	1	6	1	2	1	1	2	1	0	1	0	1	-2	1	3
Ps-ab16B	-2	0	0	0	0	0	0	0	0	0	0	2	0	-1	-1	0	0	2	0	3	3	0	1	0	0	0	0	0	-1	3	-1	0	0	0	0	0	7
Ps-ac1A	-1.71429	-2	-2.85714	1.42857	-1.14286	-1.71429	-2	2.57143	-0.285714	0.571429	-2	-0.857143	0	0.571429	3.42857	0	-1.42857	-2.57143	-0.285714	2.57143	5.71429	0.285714	-3.42857	-3.14286	1.42857	2.85714	-0.285714	-3.71429	-3.71429	-4.85714	-1.14286	0.857143	-4.85714	-2.57143	-4.28571	0.571429	2
Ps-ac1B	1.14286	1.14286	1.42857	0.571429	0.571429	0	46.2857	29.4286	2.57143	0.571429	0.571429	1.14286	-3.14286	-0.571429	3.14286	-2.28571	1.71429	2.57143	21.4286	48	44.2857	4.85714	2.85714	-3.71429	0.857143	0	-2.28571	-1.14286	-2.85714	-2.85714	39.4286	48.8571	52.8571	19.7143	0.285714	81.1429	2
Ps-ac1C	2.85714	-1.42857	1.71429	32.5714	-3.71429	-0.571429	40.2857	-1.42857	4	18.8571	5.42857	30	7.14286	0	22.8571	-3.14286	39.7143	-2.85714	-2.28571	26.2857	32.2857	30	2.28571	41.7143	0.857143	23.1429	-3.14286	2.28571	-3.42857	1.14286	4.28571	8.28571	32.2857	-2.28571	4.28571	29.4286	3
Ps-ac2A	0.2	-1	1.4	7	4.6	-1.4	79.2	38.2	3.8	6	24.6	2.4	-2.4	5.2	-0.2	1.2	19.6	40.8	33.2	33	2.4	9.6	-2.6	-1.8	3.4	-2.8	1.2	0	-2	-3.8	66.8	49.4	11	1	1.4	9	6
Ps-ac2B	2.6	-0.4	1.2	6.8	-1.6	1.6	1	10.4	-0.2	36.2	5.2	3	7	0.8	0.2	-1	1.6	1.2	25.2	27.8	28.8	1.2	-1.4	3.6	3.6	43.4	-0.4	1	0.4	-1.4	19.4	34.4	32.4	0.6	21	32.2	2
Ps-ac2C	-0.8	5.6	1	7.8	1	7.8	0.2	2.4	0	-2.4	5.6	8.2	1.8	-8	6.8	-1.4	7.8	-0.6	26.4	7	22.8	14.4	1.4	-8.4	2.8	4.2	-2.4	2.4	3.2	-10.8	-7	3.8	18.2	0.6	1.6	16.8	2
Ps-ac3A	8.33333	3.83333	9.16667	-1.5	2.16667	1	1.83333	-0.166667	6.66667	0.833333	-2.66667	1.16667	0.833333	4.16667	4.16667	2.5	8.66667	2.16667	2.16667	0.333333	1.5	16.1667	119.167	20.3333	57.6667	11.3333	3.16667	122.167	38.1667	16.1667	1.66667	-0.5	1.66667	-0.666667	3	13	6
Ps-ac3B	-0.666667	-0.666667	0.166667	15	0.5	0.833333	2.83333	1.83333	-2.83333	0.666667	2.16667	0.666667	0.5	2.83333	0.5	-2.16667	0.666667	0.5	1.16667	2.83333	14.6667	2.83333	-2.33333	-2.5	-0.5	-2	0	-3	1.33333	-2.16667	0.666667	1.66667	2	0.166667	-0.333333	0.333333	3
Ps-ac3C	-0.333333	-0.5	0	0.166667	-0.5	-0.333333	5.33333	0.333333	0.333333	-0.333333	0.833333	-0.333333	0	0.5	45.1667	-0.333333	-0.333333	0	-0.666667	0	-0.333333	0	-0.333333	1.33333	0	0.333333	-0.166667	0.333333	0.666667	0.833333	0.666667	0.333333	0.166667	-0.166667	0.333333	-0.833333	2
Ps-ac4A	3	1.5	-3	-3	2	-3.5	-1	6	5	2.5	0	-4	-1	3	2	2	4	-3	2	-1	2	4	-3	1	5	2.5	1	-1	-4	-5	1	-2	-4	-7	-4	-1	2
Ps-ac4B	12.5	2	1	67.5	2	1	86	17	3	29	9	15	0	-2	25	1	-3	7	51	58	26	72.5	2	-1	37.5	0	-1	-2	-1	-3	35	48	61	5	29	61	4
Ps-ac4C	8	1.5	0	-7	-1	-6	0	-6	-1	-13.5	0.5	-2	-10	-3	2	-11	-6	-3	-6	2	-7	-16	0	2	2	50.5	26	25	32	0	-3	5	8.5	0	-11	-10	10
Ps-ac5A	-1	-1	-1	3.5	-2.5	1	89	2.5	4.5	11	11	15.5	-0.5	1.5	3.5	-0.5	12.5	9	19	15	26	23	-1.5	-3	0	-2	0	1	-0.5	-2	12.5	24.5	26	2.5	-0.5	39	2
Ps-ac5B	-1	0	0.5	35.5	0	0	-0.5	-0.5	2	0	0.5	-0.5	-1.5	1	0	0	-0.5	1.5	4	2	1	3.5	0	0	0.5	0	-0.5	-0.5	0	-1	0	1	3.5	0	0	-1	10
Ps-ac5C	1.5	0	1	5	3	-1.5	25	4.5	1.5	2	2	0.5	4	0	4.5	1	4	0.5	0.5	1.5	6	0	0	-2.5	0.5	30.5	1	2.5	0.5	10.5	2	3.5	2.5	1.5	0.5	2	2
Ps-ac6A	1.2	0	-2.4	16.4	2.4	2	0.4	44.8	0.8	-0.8	19.8	0.8	2.8	12.4	0.4	2.4	6	4.8	-1.2	4.4	10	34.4	59.6	-0.4	98.4	45.2	2.4	51.6	18.4	9.6	0.8	2.8	1.6	14.4	2	21.2	12
Ps-ac6B	0.4	0.4	0	-1.6	1.2	1.6	25.6	0	-0.8	1.2	-1.2	-0.4	-1.2	-2	65.6	1.6	-0.4	-0.8	1.6	0.4	2.4	-1.6	-1.2	0.8	1.2	20	0.4	0	1.2	-2.4	-1.6	0.8	4.4	0	2.8	-2	2
Ps-ac6C	74	4.8	83.6	71.2	65.2	14.8	51.2	36.4	84.4	102	76.8	100.8	39.2	90.4	4	103.6	98.8	29.2	89.6	105.2	54.8	38.8	-14.4	28	-2.8	-1.6	-0.4	-8	-7.6	-12	0	-2	11.6	40.8	17.2	45.2	6
Ps-ac7A	0	-1.33333	-10	-13.3333	6	-2.66667	-6.66667	13.3333	1.33333	-16	-14	-12.6667	-20.6667	-14.6667	-6	-3.33333	-5.33333	2	40	25.3333	70	42	4.66667	12.6667	4.66667	33.3333	-2.66667	-5.33333	-1.33333	-6	18	18	50	26	-3.33333	30	4
Ps-ac7B	-1.33333	0	-0.666667	-2.66667	0.666667	0	0.666667	14	-1.33333	-2.66667	-2	-3.33333	-2	-2	-4	0	-2.66667	1.33333	-1.33333	66	-2.66667	0	0	0	-0.666667	0	0.666667	0	0	-2.66667	28.6667	48.6667	48.6667	52	1.33333	-2	4
Ps-ac7C	1.33333	0	2.66667	-6.66667	1.33333	0.666667	-2.66667	-0.666667	2.66667	-1.33333	-0.666667	-2.66667	-3.33333	-3.33333	34.6667	1.33333	-0.666667	1.33333	-4	-4.66667	-4.66667	-1.33333	36.6667	1.33333	18	-2	0.666667	42	14.6667	-4.66667	-3.33333	-6	-5.33333	-3.33333	-6	2	6
Drosophila melanogaster
	limonene	Ethyl acetate	Ethyl hexanoate	Ethyl 3-hydroxybutyrate	Hexyl hexanoate	Propyl acetate	acetoin	2.3-butanedione	2-heptanone	6-methyl-5-hepten-2-one	1-hexanol	1-octen-3-ol	2-methylphenol	2-phenylethanol	2.3-butanediol	2-methylisoborneol	Linalool	Acetaldehyde	Benzaldeyde	Butyraldehyde	Valeraldehyde	E2-hexanal	Ammonia	Diethylamine	Ethyl amine	Pyrrolidine	Pyridine	Cadaverine	1.4-diaminobutane	2-phenylethylamine	Acetic acid	Propionic acid	Butyric acid	2-oxovaleric acid	Phenylacetic acid	Hexanoic acid	Firing rate
Dm-ab1A/42b	-3.6	183.2	-1.6	9.2	2.8	130.8	2.4	13.6	5.2	2	12.8	4.4	0.8	5.2	8.8	8.8	4	8.4	0.8	6.4	7.2	7.2	4	2	1.2	7.6	8.4	1.2	13.6	3.6	1.2	10	10.4	2	1.2	6	15
Dm-ab1B/92a	-0.4	32	-0.8	4	1.6	20	121.2	122.8	4.8	2	4.8	4	0.8	4	51.6	3.2	2.8	4.8	2	3.6	6.4	1.6	3.6	1.2	0.8	2.8	4	3.6	3.6	4	1.6	0.8	2	2.8	2	3.6	2
Dm-ab1C	2	2	4	6	2	0	2	4	2	6	0	4	8	0	0	2	0	4	0	2	0	0	0	2	0	0	0	4	0	0	6	0	0	0	0	0	10
Dm-ab1D/10a	-2.4	2	-5.2	16	0.8	2.8	3.6	4.4	5.6	0.8	2	-2	-3.2	-2.4	-2.4	0.4	-5.6	2.8	114	2	2.4	-1.6	2.8	2.8	2.4	0.8	2	-4	0.4	-2.4	0.4	2	4.4	4.8	3.2	3.2	3
Dm-ab2A/59b	-5.2	145.2	-6	19.2	2.8	46	122.8	28.8	1.6	3.6	1.6	5.2	-2.4	15.2	5.2	2.4	-2.8	2	2.4	0.8	5.2	0.8	3.2	2.8	6.4	1.2	5.6	4.4	1.6	4	4.4	15.6	16.4	5.6	28.4	13.6	3
Dm-ab2B/85a	1.2	-2	-11.2	220	1.6	-5.2	1.2	1.6	2	26	115.6	6.4	-3.6	0.8	4.8	2	-10.4	3.2	1.6	1.6	2	19.2	2	2.8	3.2	6	5.2	4	3.6	0.8	1.6	-1.2	0	2.8	3.6	6	10
Dm-ab3A/22a	25.6	45.2	226.4	12.4	24.4	32.4	30.4	29.6	14.8	13.2	9.2	116.4	2.8	36	38	3.2	24.4	14	20.4	1.6	2	12.8	3.6	1.6	3.6	0.4	4.8	8	1.2	1.2	21.2	26.4	60.8	4	21.2	93.6	14
Dm-ab3B/85b	31.2	4	9.2	222.4	6.8	1.6	2.4	7.2	196.4	189.2	151.2	145.6	4.8	16.8	9.2	4	20	4.8	24.8	4	3.6	113.2	2.8	1.6	1.6	24.4	3.2	12.4	27.2	1.2	13.2	36.8	13.6	6.4	14	20.4	6
Dm-ab4A/7a	1.2	4	-9.2	-6.4	-8.4	-2.8	3.6	4.8	-3.6	-22.4	114	4.8	-25.2	0.4	-12.8	5.6	14.4	32.8	177.6	44	136.4	216	-13.2	-5.2	-8.8	-10.4	2	-17.6	-10.4	-8.4	-9.6	1.2	19.6	0.4	2	2	18
Dm-ab4B/56a	0.4	1.6	-4	-1.6	-8.4	-2	2	0.8	0.8	-11.6	-1.2	1.2	-9.2	0.8	-2.8	1.6	2	2	2.4	1.2	1.6	0.4	-3.2	-3.2	-1.6	-1.2	1.6	-1.6	-2	0	-0.8	1.6	1.2	1.2	1.2	1.6	10
Dm-ab5A/82a	2	10.4	9.2	1.2	0.4	7.6	2	16.8	28.4	56	44	26.4	-4	19.6	15.6	2.8	1.2	4.4	-2.4	3.6	9.2	-1.6	1.2	3.6	2	3.2	2.4	-1.2	0.8	2.4	4	4.8	17.2	4	5.6	17.2	20
Dm-ab5B/47a	21.2	84	119.2	62.8	-1.6	194	3.6	19.2	173.6	34.4	49.2	89.6	-5.2	8	1.2	4.8	11.2	14.4	15.6	18.4	18	20.8	8.8	2.8	2.4	2.4	0.8	-1.6	4.4	4.4	2	2.4	9.6	4.8	2.8	5.6	3
Dm-ab6A/13a	2.8	2.8	2	99.6	2.4	3.6	1.2	2.4	2	154.4	158.4	211.6	-3.6	1.2	2.8	2.4	2.4	3.6	3.2	9.6	8.8	75.6	7.2	8.8	8.4	26.4	2	10.4	8.4	4.8	4.8	10	30	10.4	9.6	12	10
Dm-ab6B/49b	3.6	10.4	-1.2	40	0.8	10.8	2.8	4	14	-3.2	28.4	8.4	210.4	37.6	-3.2	2.4	-2	65.6	99.2	-4	-4.4	4.8	0.8	2	2.8	3.2	3.2	1.6	2	0	2.4	4.4	2.8	1.6	2.4	1.2	8
Dm-ab7A/98a	26	17.2	48.8	190	-4.4	146	1.6	25.2	173.2	209.6	151.6	183.2	-14.4	-5.6	6	1.2	124.8	16.8	18.8	18	18.8	16.4	8.4	2	2.8	1.2	3.2	19.6	2	3.6	8.4	10	8.8	-2.8	3.2	6.8	7
Dm-ab7B/67c	9.6	31.6	-2.4	80.8	2.8	62.8	1.2	42.8	28.8	10	97.2	16.8	0.8	59.6	27.2	3.2	5.2	8.8	6	16.8	23.2	39.6	7.2	7.6	5.6	1.6	1.6	9.6	2	3.6	3.6	9.2	8	8.8	0.4	8.4	2
Dm-ab8A/43b	2	127.2	2.8	128	-2	152.8	2.8	41.2	56	28	65.6	33.6	24.4	1.6	94.8	4.8	0.8	12.4	9.2	2.4	8	74	1.6	2.4	4	7.6	0.8	10.4	2.8	1.6	3.2	2	10	1.2	2	2	5
Dm-ab8B/9a	3.6	26.8	11.2	188.4	-1.6	148.4	124.8	54	96.4	42.4	94	50.4	34	10.8	196.8	0.8	2	5.2	95.2	48	22.8	26.8	26.4	7.6	10.8	17.2	0.4	11.6	6	7.6	4	10	119.2	13.2	1.6	11.2	2
Dm-ac3B/35a	28	9.6	-12	25.6	102	92	31.6	10.4	120.4	-4.8	224.8	117.6	-7.2	49.2	1.6	-3.2	13.6	-1.2	68.8	80	66.4	196	3.6	4.8	7.2	3.6	1.6	3.2	15.2	1.6	2.8	1.2	6	1.6	4.4	4.8	20
Dm-ac1	19.6	-4.8	15.6	-2.4	7.2	15.6	6	1.6	-2.4	-6.4	-2.8	-4.8	-3.2	4.4	-5.2	2.4	8	-0.8	-1.2	4.4	4.8	-4	187.2	65.2	58.8	30	20.8	24.8	-9.6	-6	4	2.4	-12.4	48.8	-2	9.2	50
Dm-ac2	2.8	-5.2	11.6	-28.8	-9.6	-13.2	-5.6	37.2	-4	-26.4	-24.8	-23.2	-39.2	-22.8	-5.2	-6.8	-21.6	4.4	-20.8	15.6	9.6	-12.4	-12	-7.2	-7.6	56.8	104	33.2	196.8	-30	128.4	22.8	95.6	-4.8	-6.4	-4	32
Dm-ac3A	1.6	-1.6	-2.4	1.2	1.2	-1.2	-3.2	0.8	-1.8	4.4	2	3.2	1.6	-3.2	1.2	1.2	1.2	1.2	2.8	1.6	0.4	2.4	-3.6	-3.6	2.4	1	2.8	2.4	4	4	1.6	2.8	175.2	95.6	2.4	0.8	10
Dm-ac4	-2.4	-3.2	-1.2	-5.2	0.8	-3.6	-6.8	2.4	-0.8	-8.4	-2	3.2	-10.8	0.8	2.4	-10.4	-7.2	-1.2	1.2	5.6	10.4	11.6	30.4	26.8	28	32.8	-6.4	-5.2	18.8	108	-3.6	2	2.4	1.6	130.4	20	15
