# Supplementary material for: Evolution of insect olfactory receptors
Source: eLife. 2014 Mar 26;3:e02115. doi: 10.7554/eLife.02115 (PMC3966513; doi:10.7554/eLife.02115)
Supplement: Figure 6—source data 1. — DOI: http://dx.doi.org/10.7554/eLife.02115.017 [file elife02115s007.xlsx]

## Sheet: Sheet1
Lepismachilis y-signata
Race-Primer	Sequence	tm (OligoCalc)	length of fragment	final name of candidate	contig name - initial assembly
LsIR1_3´race	GCGTCATTGATTTCACGGTGCCATA	65.8		LsigIR25a	Lepi_Contigs_lepismachilis_antenna_and_palps.fasta-20434
LsIR1_5´race	GCCACACGTCGTTTTCGAGCACA	66.6
LsIR2_3´race	GGGTCGGCGACAGCCACCTACTT	69.9		LsigIR25a	Lepi_Contigs_lepismachilis_antenna_and_palps.fasta-28041
LsIR2_5´race	CACAGCCAGCTTGGCCCTCTCAA	68.3
LsIR3_3´race	TGCACAACATCACCAAATCAAATGCAC	65.3		LsigIR8a	Lepi_Contigs_lepismachilis_antenna_and_palps.fasta-2689
LsIR3_5´race	CGCGGGAACACAGAGATGTAAGACACA	69.9
LsIR4_3´race	TGAACAGGGAGGAATGGCCAGCA	66.6		LsigIR25a	Lepi_Contigs_lepismachilis_antenna_and_palps.fasta--13504
LsIR4_5´race	CCCGTAAGAGTTGCTAGGGCGCTGA	70.7
LsIR5_3´race	TCCGGTGGCAAAGAGGATGGTGA	66.6		LsigIR9	Lepi_Contigs_lepismachilis_antenna_and_palps.fasta-30147
LsIR5_5´race	TGCCACGTGGAAGGCAAACATGC	66.6
LsIR6_3´race	TGACGAAACCAAGCGTTTGGAAGGA	65.8		LsigIR1	Lepi_Contigs_lepismachilis_antenna_and_palps.fasta-2397
LsIR6_5´race	TCCCAGGTGAAACGACACGAGACA	66.9
LsIR7_3´race	TGGTGACGGGCATTGTTCTGTGC	66.6		LsigIR3	Lepi_Contigs_lepismachilis_antenna_and_palps.fasta--6812
LsIR7_5´race	CCATCCCAGCGTGGACTAAGTGTGTG	71.1
LsIR8_3´race	TCACCACGTTTCACAGCCCTCCTG	68.5		LsigIR3	Lepi_Contigs_lepismachilis_antenna_and_palps.fasta-17027
LsIR8_5´race	CCCCATAGCCATCCTTCTGGTGGA	68.5
LsIR9_3´race	TGTGTCGAGGTGACGCGAGGTTG	68.3		LsigIR76b	Lepi_Contigs_lepismachilis_antenna_and_palps.fasta--26127
LsIR9_5´race	GTAGCGAACAGCAGGCGGGAGGA	69.9
LsIR10_3´race	CCCAAGCGATGCACCTTCGTG	65.3		LsigIR76b	Lepi_Contigs_lepismachilis_antenna_and_palps.fasta-89_2
LsIR10_5´race	TGTTTCGTGATGCCAGATTCCACCA	65.8
LsIR11_3´race	CCAAAGTGGTCTCCGCTGACTCCTG	70.7		-	Lepi_Contigs_lepismachilis_antenna_and_palps.fasta--16362
LsIR11_5´race	GGGCGTCTTCTCGATGTATTTGTTTCG	68.2
LsIR12_3´race	ACGTGGACAACAGAAGACCGCTTCG	69.1		LsigIR10	Lepi_Contigs_lepismachilis_antenna_and_palps.fasta--27386_2
LsIR12_5´race	TCCAAGGCATGGCCTCGACAA	63.2
LsIR13_3´race	CGCAAAGTGATGGTCTAAAGTGGGGAAG	70.1		-	Lepi_Contigs_lepismachilis_antenna_and_palps.fasta--30392_2
LsIR13_5´race	TGCCCTTTGATAGCTTACATCTCCCATCA	69.1
LsIR14_3´race	TGTGTGTGAGTAATTGGCCCCCGTTTT	68.2		LsigIR7	Lepi_Contigs_lepismachilis_antenna_and_palps.fasta-19562_2
LsIR14_5´race	CGTGGGCAGGAGCTAAAAGTGTGTGT	69.5
LsIR15_3´race	TGG CTG GGC AAC GGG ATT TGT GA	66.6		LsigIR3	Lepi_Contigs_lepismachilis_antenna_and_palps.fasta--28767
LsIR15_5´race	CCAATCTTCGTCGCTGCTGCCAAT	66.9
RT-Primer	Sequence	tm (Primer 3)		final Name of candidate
LsIR1for	GCAATTGGAGAGGGAGAGGA	61.65	538	LsigIR25a	Lepi_Contigs_lepismachilis_antenna_and_palps.fasta-20434			Fragments used for in situ probe prepartation
LsIR1rev	CGTCATGCAGAACCAAAGACA	62.21
LsIR2for	GCTACCTGGTGGTTGTTTGGA	62.22	360	LsigIR25a	Lepi_Contigs_lepismachilis_antenna_and_palps.fasta-28041
LsIR2rev	CGGGAGTCCAGATTCCTTCA	62.48
LsIR3for	ACCAGCGACCAGACCAAGTT	62.06	638	LsigIR8a	Lepi_Contigs_lepismachilis_antenna_and_palps.fasta-2689
LsIR3rev	CACTTGCGAGAGTGAGTGCAT	61.61
LsIR4for	CGGCGGACGACATGAAGTAT	63.28	429	LsigIR25a	Lepi_Contigs_lepismachilis_antenna_and_palps.fasta--13504
LsIR4rev	TGTAGCTTTGCCCATTTTCG	61.12
LsIR5for	TCTTCCATTCACGCTGTTCG	62.31	616	LsigIR9	Lepi_Contigs_lepismachilis_antenna_and_palps.fasta-30147
LsIR5rev	CCAGCAGACCACATTTTTCG	61.6
LsIR6for	CCTCTGACAACGCAAAATGG	61.6	786	LsigIR1	Lepi_Contigs_lepismachilis_antenna_and_palps.fasta-2397
LsIR6rev	CCAGGTGAAACGACACGAGA	62.27
LsIR7for	CAGTCTTTACAGCTGCTTTTGTGA	60.97	477	LsigIR3	Lepi_Contigs_lepismachilis_antenna_and_palps.fasta--6812
LsIR7rev	ATACCATCCCAGCGTGGACT	61.7
LsIR8for	GACATTGAATCGTGGGATGG	61.14	400	LsigIR3	Lepi_Contigs_lepismachilis_antenna_and_palps.fasta-17027
LsIR8rev	TGAGAAAGGTTATGCACGTTCC	61.38
LsIR9for	AAAGGAATCGCGTTCGACAT	61.89	563	LsigIR76b	Lepi_Contigs_lepismachilis_antenna_and_palps.fasta--26127
LsIR9rev	AGGTTGGCCGTGTAGAAGGA	61.96
Lsrl31_for	GCGAAGCAAAAGGGTGAAAA	56.4	268		LepiContigs_lepismachilis_antenna_and_palps.fasta-12709_2
Lsrl31_rev	CGTTACGTCTTCGGGAAAGG	60.5
Race-Primer	Sequence	tm (OligoCalc)	length of fragment	final name of candidate	contig name - initial assembly
Tdom_58102_rev	CTG ACC CGG CAT ACC ATG AAC	63.2		TdomORCO1	Tdom58102
Tdom_ 89961_for	TGC ACC CAT GAT GCG TTG GTT T	62.1		TdomORCO1	Tdom89961
3RaceTdomOrco1	CGT CTT ATC GTG GGT GCT TGG TAC C	69.1		TdomORCO1
5RaceTdomOrco1	ACG CCG TGA ATG GCA AAC GTA GTC G	69.1		TdomORCO1
Tdom_63211_for	CGA ACT CAG CGC TGG AAG AG	62.5		TdomORCO2	Tdom63211
3RACE_Tdom63211	GGA TGC ATG GTA TCC GTG GAG CCT C	70.7		TdomORCO2	Tdom63211
5RACE_Tdom63211	CCA GCG CTG AGT TCG ACC AAT GGA G	70.7		TdomORCO2	Tdom63211
Tdom_ 69868_for	AGC GTC GGA GAC ACC TAT GG	62.5		TdomORCO2	Tdom69868
3RACE_Tdom69868	TGG GTG GAG AGG CAT AAA CAT GTC GTG	69.9		TdomORCO2	Tdom69868
Tdom_56932_rev	GTG CCC TCT GAC TCC GTT GA	62.5		TdomORCO3	Tdom56932
5RACE_Tdom56932	CGG AGC CTT TGT GCC ATG CCT TGG	70.6		TdomORCO3	Tdom56932
3RACE_Tdom81076	TCA CCA GAG GAG AAA GGC ATG GCT GA	69.5		TdomGR1	Tdom81076
5RACE_Tdom81076	GTG CCA GGT GTC CAG CTT TGC GAA C	70.7		TdomGR1	Tdom81076
5RACE_Tdom86980	CCG CCA AGC ACA CAA TCA CTG CAC C	70.7		TdomGR2	Tdom86980
5RACE_Tdom1604	CGT CAC AGC GCC AGC AAT CGA GC	69.9		TdomGR4	Tdom1604
5RACE_Tdom61232	ACT GCT GCC ACC ACC GAG TGA AGT A	69.1			Tdom61232
RT-Primer	Sequence	tm (OligoCalc)	length of fragment	final name of candidate	contig name - initial assembly
TdomOrco1_for	CCA TTC ACG GCG TCA TCA AAT T	60.1	1036	TdomORCO1
TdomOrco1_rev	TCT GAC CCG GCA TAC CAT GA	60.5
TdomOrco1full_f	ATG CCG GAA CCT CAA AAG GGG	63.2		TdomORCO1
TdomOrco1full_r	TTA TTT CAT CTG GAC GAG GAC AAT GA	62.9
TdomOrco2_full_f	ATG AAG TAC ATA CGA CAA GGT TTG	60.3	1455	TdomORCO2
TdomOrco2_full_r	TTA CTT CAG CTG TAT CAG CAC C	60.1
TdomOrco3_full_f	ATG CTT GGT TTT CAA AGT TTA CAA GT	60.1	1458	TdomORCO3
TdomOrco3_full_r	TTA TCC CAG CTG AAT AAG GAC C	60.1
Tdom_rl31_for	CTT CAC AAG CGG TTG CAT GG	60.5	174		Tdom5825
Tdom_rl31_rev	CAC GCG GAC ACG GAA TGG	60.8
